# Supplementary material for: Fabrication of a Sm2O3/In2S3 photocatalyst for boosting ciprofloxacin oxidation and the Cr(vi) reduction: process parameters and degradation mechanism
Source: Royal Society of Chemistry journal article supplement (doi:10.1039/d2ew00894g), 2023-01-01
Supplement: d2ew00894g1.pdf [file d2ew00894g1.pdf]

### **Supplementary Materials**

#### **Fabrication of $\text{Sm}_2\text{O}_3/\text{In}_2\text{S}_3$ photocatalyst for boosting Ciprofloxacin oxidation and Cr (VI) reduction: Process parameters and degradation mechanism**

**M. Murugalakshmi <sup>a1</sup>, Kadarkarai Govindan <sup>b1</sup>, Muthu Umadevi <sup>c</sup>, Carmel B Breslin <sup>d</sup>  
and Velluchamy Muthuraj <sup>a\*</sup>**

<sup>a</sup>Department of Chemistry, V. H. N. Senthikumara Nadar College (Autonomous),  
Virudhunagar-626 001, Tamil Nadu, India.

<sup>b</sup>Department of Civil, Construction and Environmental Engineering, Marquette University,  
1637 West Wisconsin Avenue, Milwaukee, WI – 53233, United States of America.

<sup>c</sup>PG & Research Department of Chemistry, Nehru Memorial College, Puthanampatti,  
Tiruchirappalli, Tamil Nadu – 621 007

<sup>d</sup>Department of Chemistry, Maynooth University, W23F2H6 Maynooth, Co. Kildare, Ireland.

#### **Corresponding author:**

Email address: [muthuraj.v@vhnsnc.edu.in](mailto:muthuraj.v@vhnsnc.edu.in) (Velluchamy Muthuraj), Mobile: +91 94444  
27485.

<sup>1</sup> These authors contributed equally to this work.

**Table S1.** Crystallite size of different photocatalysts

| <b>Nanomaterial</b>                                                   | <b>Dislocation<br/>density<br/><math>\delta \times 10^{-3} \text{ nm}^{-2}</math></b> | <b>Microstrain<br/><math>\varepsilon \times 10^{-3}</math></b> | <b>Crystallite<br/>size (D) nm</b> | <b>Stacking<br/>fault (degree)</b> |
|-----------------------------------------------------------------------|---------------------------------------------------------------------------------------|----------------------------------------------------------------|------------------------------------|------------------------------------|
| Sm <sub>2</sub> O <sub>3</sub> /20 wt% In <sub>2</sub> S <sub>3</sub> | 1.96                                                                                  | 13.26                                                          | 22.58                              | 0.009203                           |
| Sm <sub>2</sub> O <sub>3</sub> /15wt% In <sub>2</sub> S <sub>3</sub>  | 1.21                                                                                  | 4.85                                                           | 28.69                              | 0.00544                            |
| Sm <sub>2</sub> O <sub>3</sub> /10wt% In <sub>2</sub> S <sub>3</sub>  | 1.28                                                                                  | 8.79                                                           | 27.94                              | 0.00603                            |
| Sm <sub>2</sub> O <sub>3</sub> /5wt% In <sub>2</sub> S <sub>3</sub>   | 1.53                                                                                  | 5.77                                                           | 25.41                              | 0.003988                           |
| In <sub>2</sub> S <sub>3</sub>                                        | 2.07                                                                                  | 12.62                                                          | 24.27                              | 0.008816                           |
| Sm <sub>2</sub> O <sub>3</sub>                                        | 1.69                                                                                  | 6.08                                                           | 21.98                              | 0.006419                           |

## Text S1 Materials

All chemicals (analytical grade reagents), including the precursors, indium nitrate pentahydrate ( $\text{In}(\text{NO}_3)_3 \cdot 5\text{H}_2\text{O}$ ), samarium nitrate hexahydrate ( $\text{Sm}(\text{NO}_3)_3 \cdot 6\text{H}_2\text{O}$ ), urea ( $\text{CS}(\text{NH}_2)_2$ ), sodium hydroxide ( $\text{NaOH}$ ), hydrochloric acid ( $\text{HCl}$ , 37%), and model pollutants  $\text{K}_2\text{Cr}_2\text{O}_7$  (99.0%), and ciprofloxacin ( $\text{C}_{17}\text{H}_{18}\text{FN}_3\text{O}_3$ ) were purchased from Sigma Aldrich, India. Sodium hydroxide ( $\text{NaOH}$ , 40 g mol<sup>-1</sup>), sodium chloride ( $\text{NaCl}$ , 58.44 g mol<sup>-1</sup>), sodium sulfate ( $\text{Na}_2\text{SO}_4$  142.04 g mol<sup>-1</sup>), disodium hydrogen phosphate ( $\text{Na}_2\text{HPO}_4$  141.96 g mol<sup>-1</sup>), tri-sodium phosphate ( $\text{Na}_3\text{PO}_4$ , 169.93 g mol<sup>-1</sup>) sodium carbonate ( $\text{Na}_2\text{CO}_3$ , 105.99 g mol<sup>-1</sup>), and sodium bicarbonate ( $\text{NaHCO}_3$ , 84.01 g mol<sup>-1</sup>) were also received from Sigma Aldrich, India. All chemicals and reagents were used directly without any further purification.

## Text S2 Analytical Characterization

Powder X-ray diffraction (XRD) was used to determine the phase purity and crystalline structure of the prepared materials. X-ray powder diffraction (XRD) patterns were collected on PANalytical X'Pert PRO powder X-ray Diffractometer with Cu K $\alpha$  radiation ( $\lambda=1.5418 \text{ \AA}$ ) in the diffraction angle range  $2\theta = 20-80^\circ$ . The accelerating voltage and emission current were 40 kV and 30 mA. Surface morphology and microstructure analysis were performed using CARL ZEISS scanning electron microscopy (SEM) and energy-dispersive X-ray analysis (EDS) using the AMETEK-EDAX (Z2e Analyzer) and Philips's transmission electron microscopy (PHILIPS CM 200 model). The qualitative elemental analysis and mapping were also obtained from an energy dispersive X-ray (EDS) spectrometer.

Optical properties of the synthesized materials were determined through UV–visible diffuse reflectance spectra (DRS), and these were recorded at room temperature by utilizing a Shimadzu UV-2450 spectrophotometer equipped with an integrating sphere using  $\text{Ba}_2\text{SO}_4$  as the standard reflectance. Further, Brunauer-Emmett-Teller (BET) specific surface area of the samples were determined by nitrogen adsorption - desorption. Photoluminescence (PL) spectra were also recorded by using a Cary Eclipse fluorescence spectrometer. The detailed qualitative chemical analysis was carried out by X-ray photoelectron spectroscopy (XPS). XPS analysis was performed using a Thermo Scientific Multi-Lab 2000 instrument with an Al Ka monochromator (1486.6 eV) as a radiation source. Electrochemical impedance spectroscopy (EIS) analysis was determined on an electrochemical workstation CHI660E using a standard three-electrode system, with glassy carbon (GC) as the working electrode, platinum wire as the counter electrode and Ag/AgCl as the reference electrode.

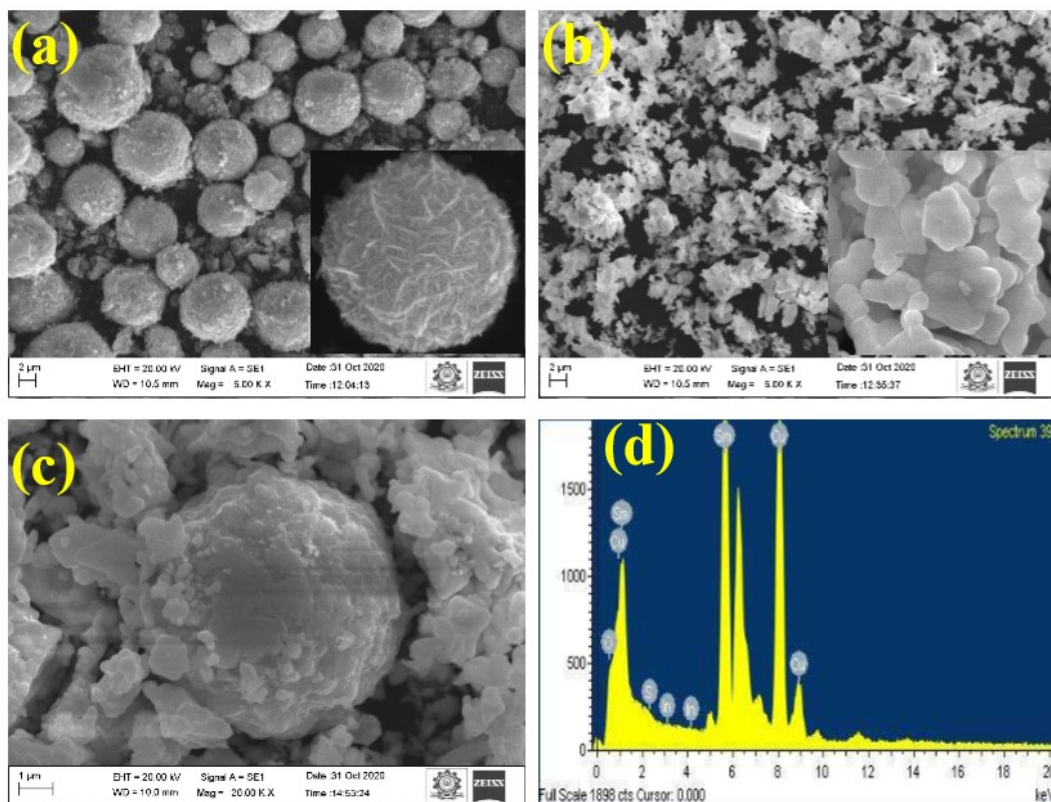

**Figure S1.** SEM images of (a)  $\text{In}_2\text{S}_3$ , (b)  $\text{Sm}_2\text{O}_3$ , (c)  $\text{Sm}_2\text{O}_3/15 \text{ wt } \% \text{In}_2\text{S}_3$  and (d) EDS spectrum of  $\text{Sm}_2\text{O}_3/15 \text{ wt } \% \text{In}_2\text{S}_3$ .

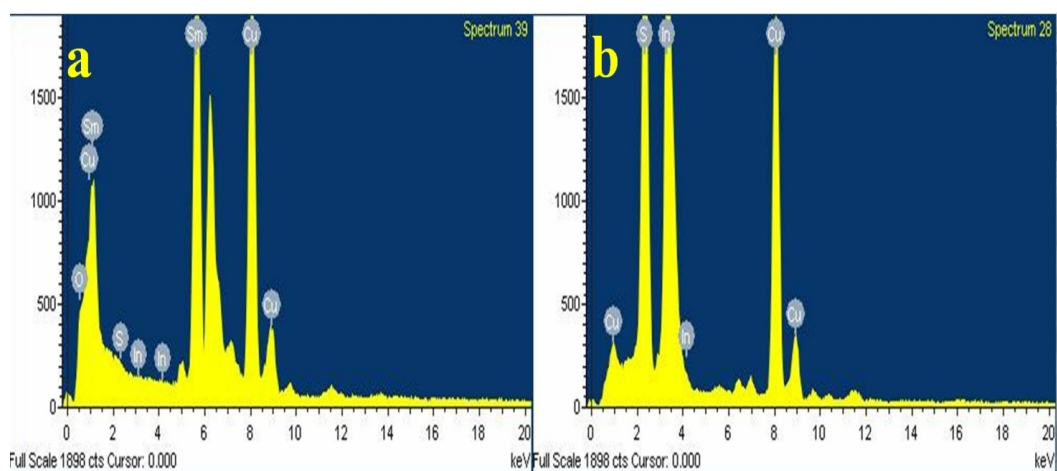

**Figure.**

Spectra of (a)

$\text{In}_2\text{S}_3$

**S2. EDX**

$\text{Sm}_2\text{O}_3$  and (b)

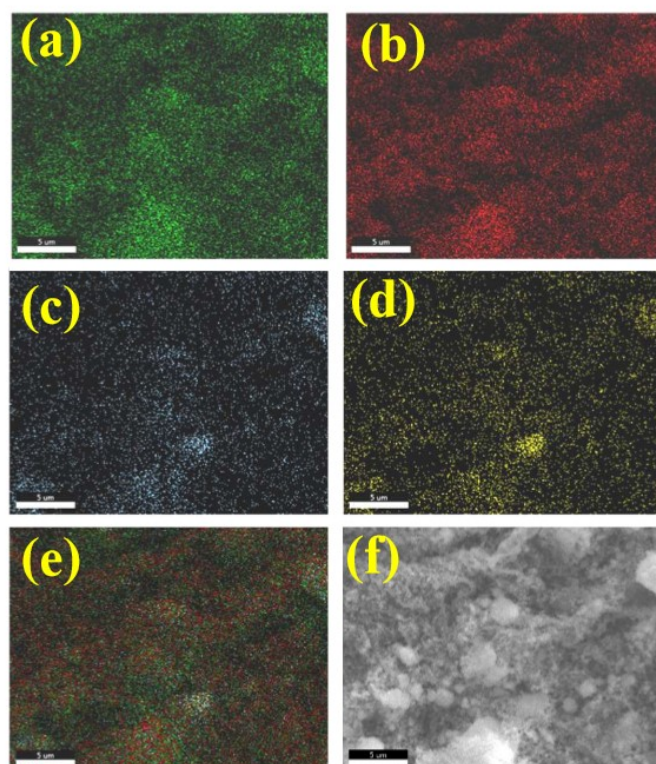

Figure. 1

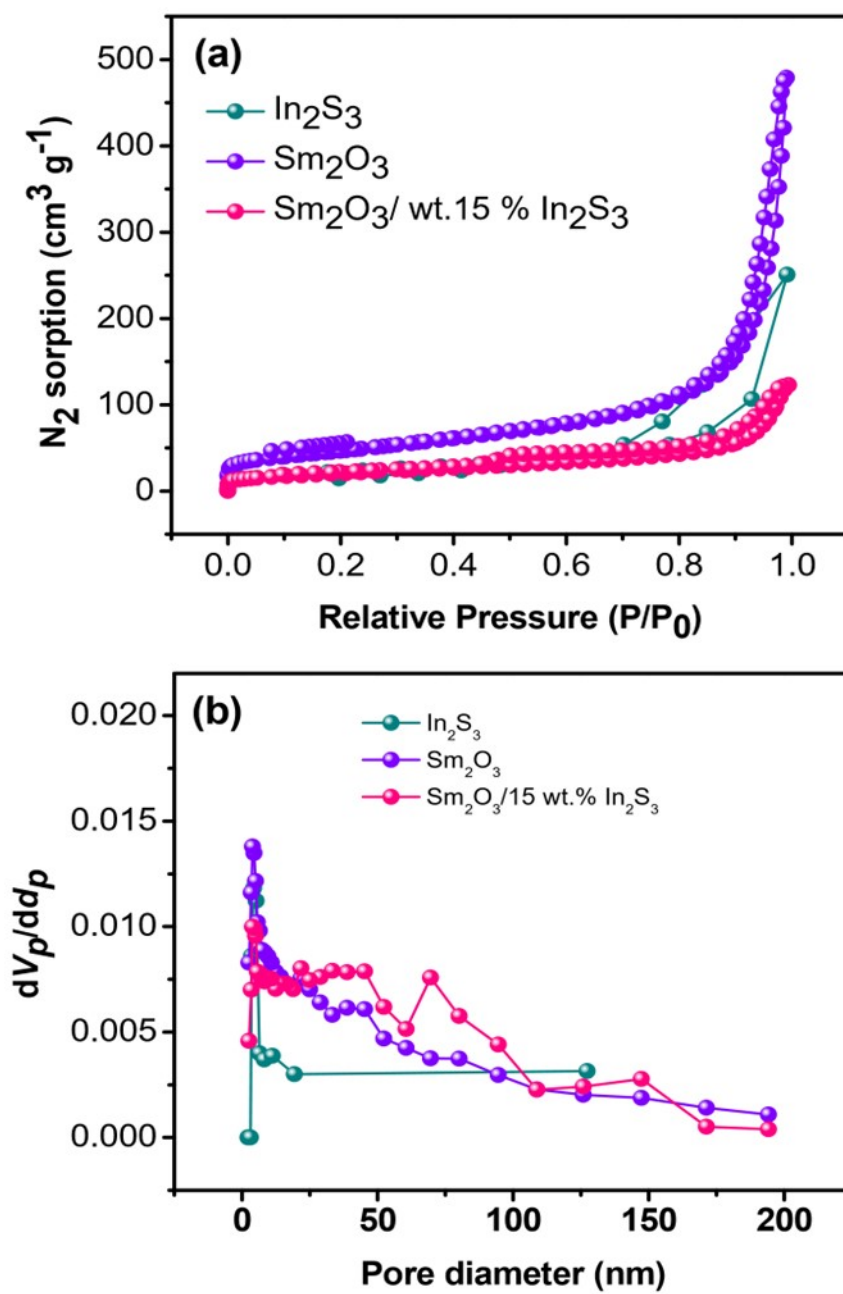

%  $\text{In}_2\text{S}_3$ .

**Figure. S4** (a)  $N_2$  adsorption/desorption, and (b) pore size distribution profiles of  $In_2S_3$ ,  $Sm_2O_3$ , and  $Sm_2O_3/15$  wt %  $In_2S_3$  nanocomposite.

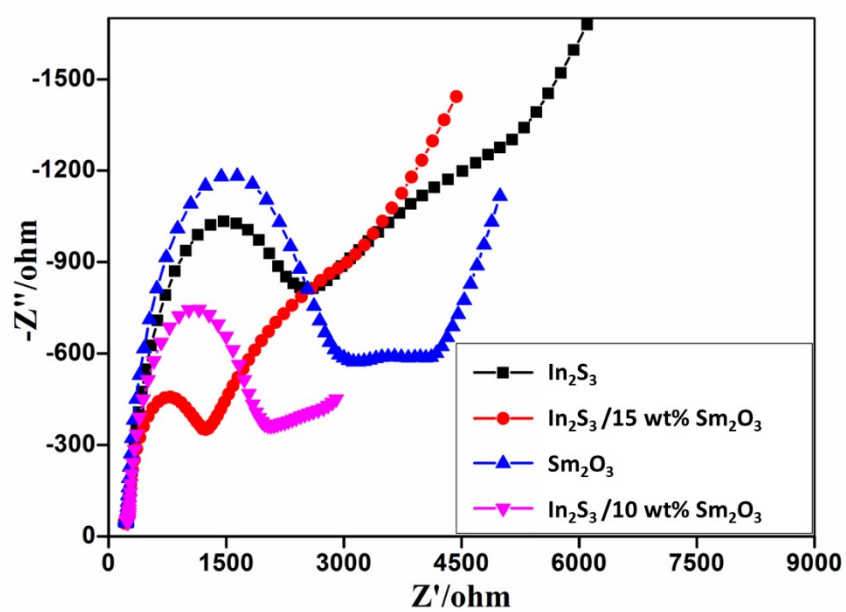

**Figure. S5** Electrochemical impedance spectra of different photocatalyst.

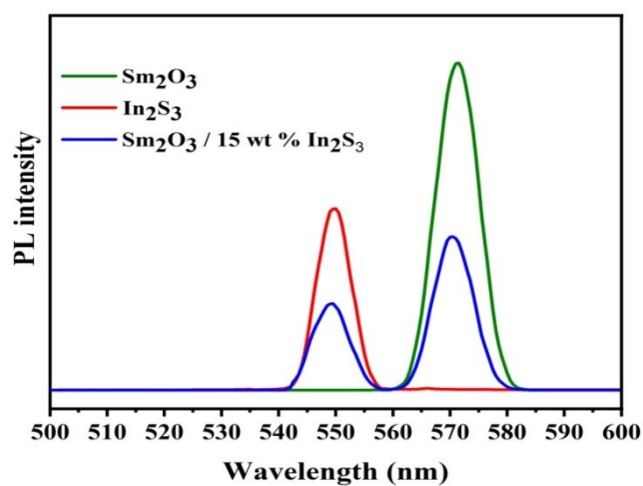

**Figure. S6** Photoluminescent emission spectra of  $\text{Sm}_2\text{O}_3$ ,  $\text{In}_2\text{S}_3$ , and  $\text{Sm}_2\text{O}_3$ / 15 wt %  $\text{In}_2\text{S}_3$

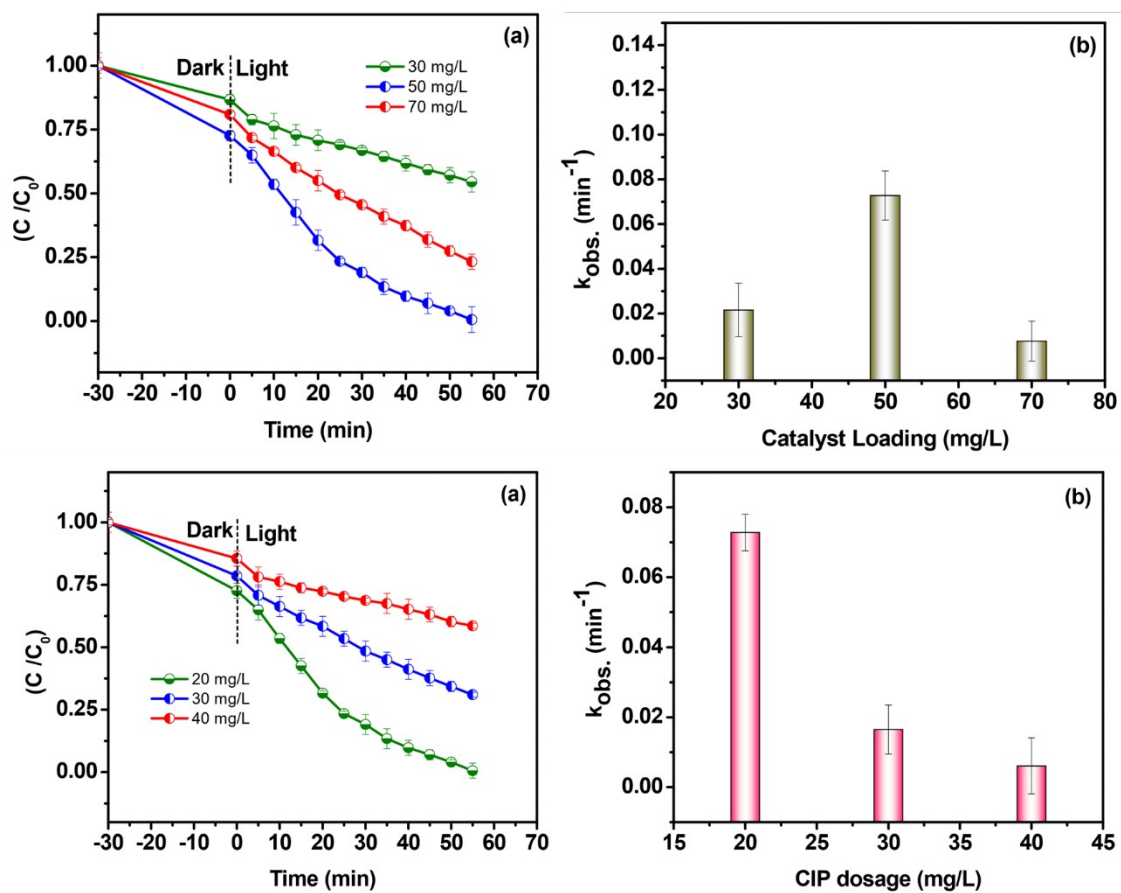

**Figure. S7.** Normalized CIP concentration profile at different catalyst ( $\text{Sm}_2\text{O}_3$ / 15wt %  $\text{In}_2\text{S}_3$ ) loading with constant CIP dosage = 20 mg/L (a); and different CIP dosage at 50 mg/L catalyst loading (c). Pseudo-first order rate constant ( $k_{obs.}$ ) for the photocatalytic degradation of CIP by different catalyst (b) and various CIP dosage (d).

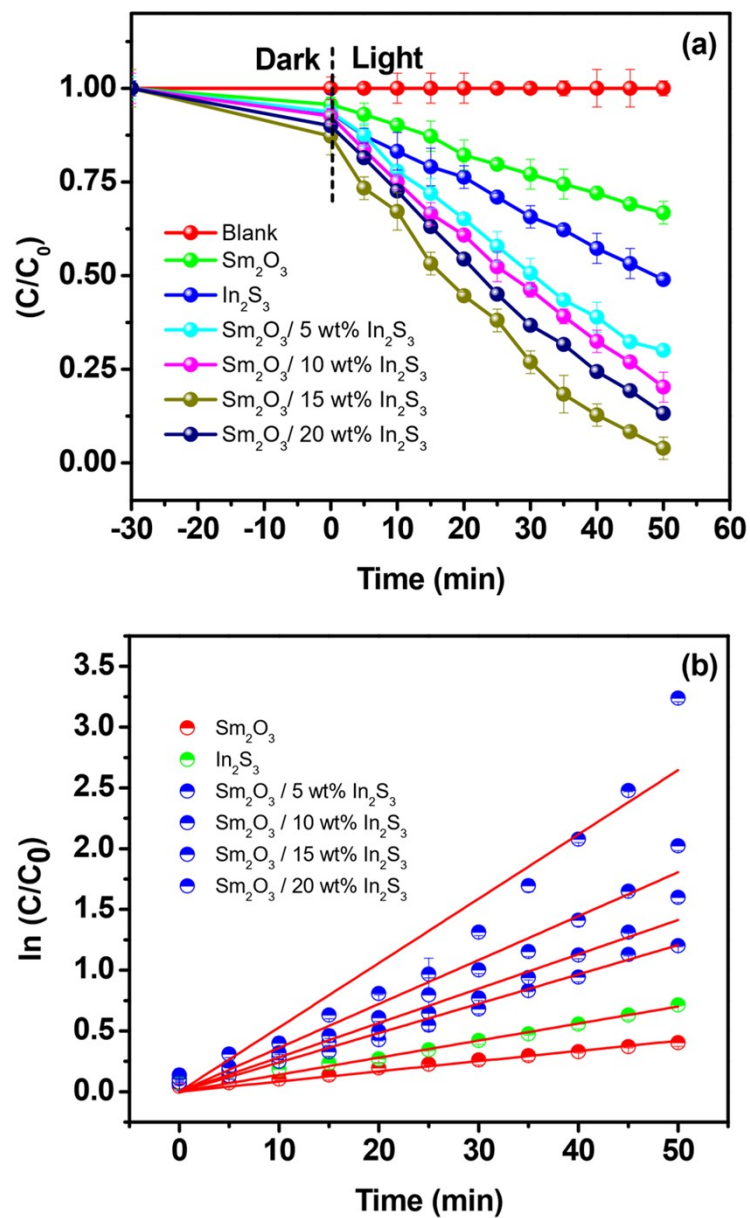

**Figure. S8** Photocatalytic reduction of Cr(VI) by different catalyst, and (b) pseudo-first order kinetic profiles . Catalyst loading = 50 mg/L, and Cr (VI) = 40 mg/L.

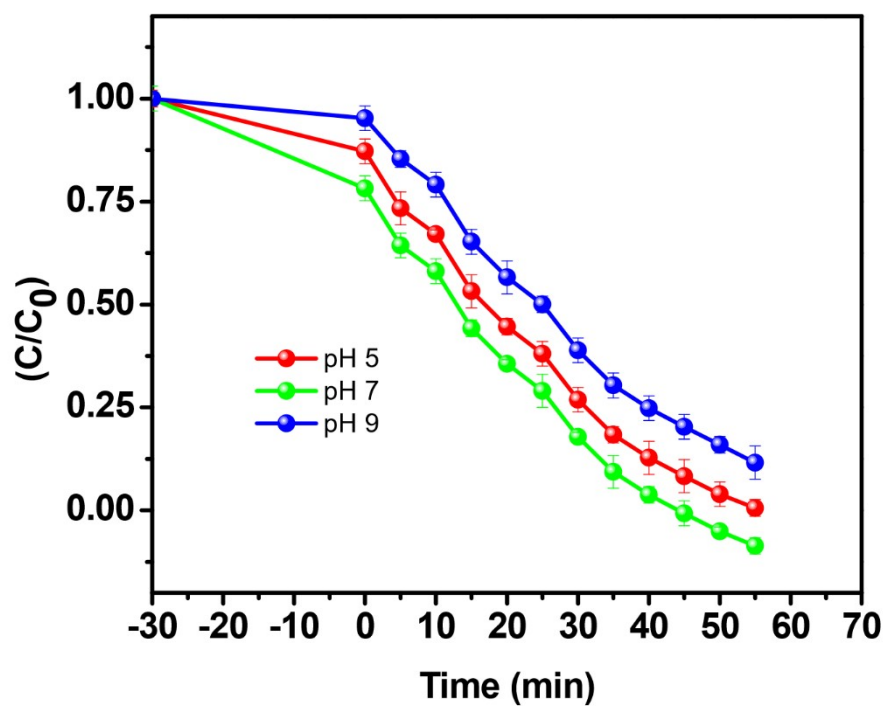

**Figure. S9** Effect of pH on Cr (VI) degradation in  $\text{Sm}_2\text{O}_3$ / 15 wt %  $\text{In}_2\text{S}_3$ , photocatalysis.

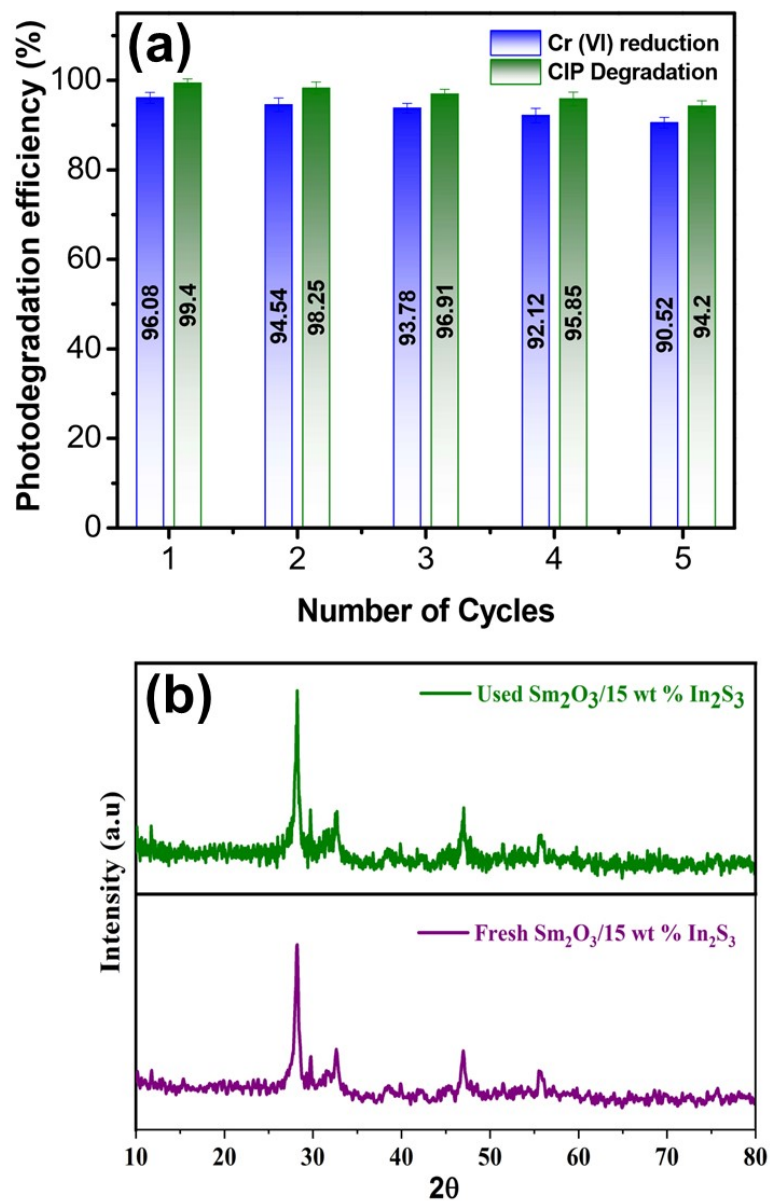

**Figure. S10.** (a) Reusable test for the photocatalytic degradation of CIP and Cr(VI) reduction using recycled  $\text{Sm}_2\text{O}_3/15\text{wt}\% \text{ In}_2\text{S}_3$  photocatalyst. (b) XRD patterns of  $\text{Sm}_2\text{O}_3/15\text{wt}\% \text{ In}_2\text{S}_3$  before and after the photocatalysis experiments.

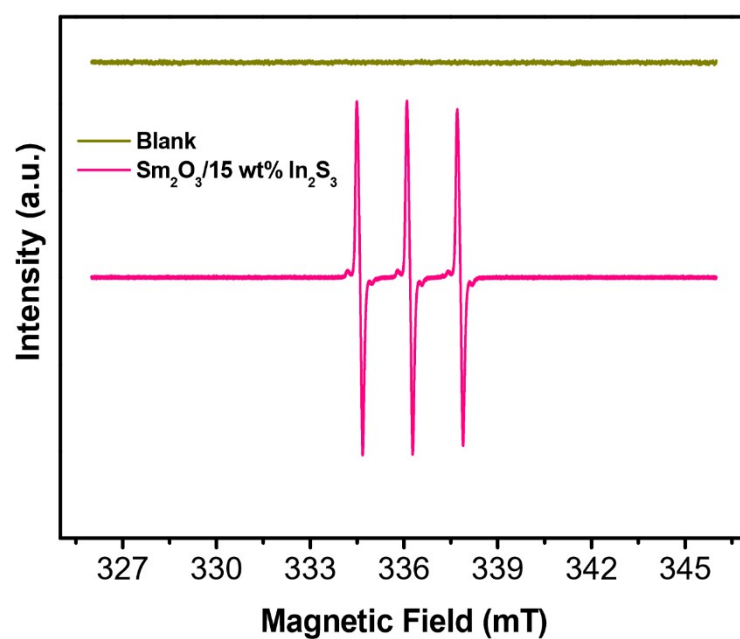

**Figure. S11** EPR spectra of TMP adduct from  $\text{Sm}_2\text{O}_3$  / 15wt %  $\text{In}_2\text{S}_3$ . TMP = 50 mM, Catalyst loading = 50 mg/L and CIP dosage = 20 mg/L.

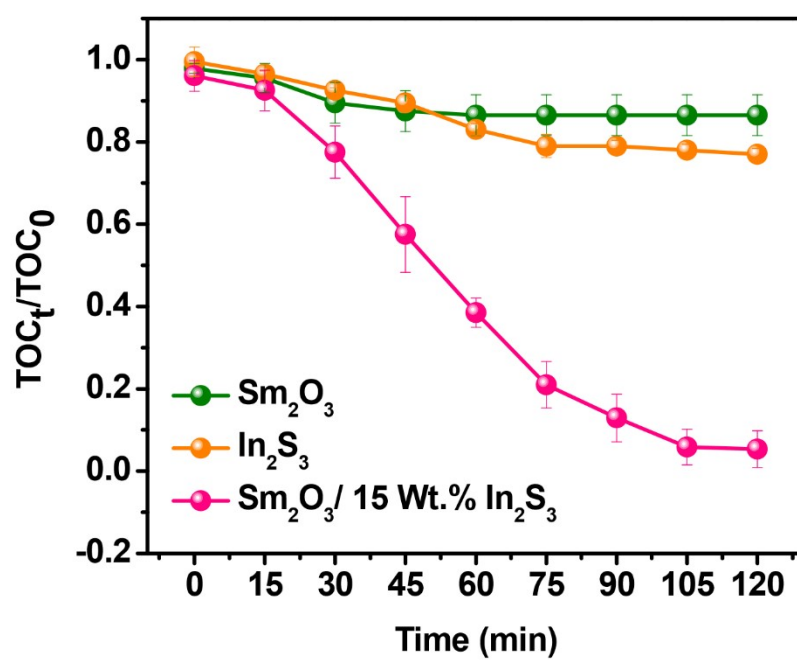

**Fig. S12** Total organic carbon reduction at different photocatalysts. Catalyst loading = 50 mg/L, and CIP dosage = 20 mg/L.

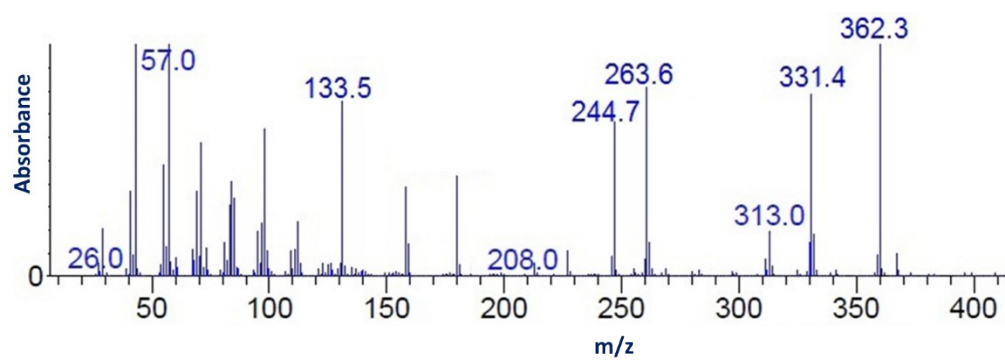

**Figure. S13.** LC-MS spectra of different photocatalytic system  $\text{Sm}_2\text{O}_3$  / 15wt %  $\text{In}_2\text{S}_3$ .
